# Supplementary material for: Dispersed VO2 phases in a flexible sensor for recognizing tensile and compressive stress
Source: Royal Society of Chemistry journal article supplement (doi:10.1039/d2tc04162f), 2022-12-01
Supplement: d2tc04162f1.pdf [file d2tc04162f1.pdf]

## Supporting information

### Dispersed VO<sub>2</sub> phases in flexible sensor for recognizing tensile and compressive stress

Tiantian Huang,<sup>§</sup> Mengxia Qiu,<sup>§</sup> Peiran Xu, Wanli Yang, Lepeng Zhang, Yunkai  
Shao, Zhimin Chen, Xin Chen,\* Ning Dai

Tiantian Huang, Mengxia Qiu, Peiran Xu, Wanli Yang, Prof. Xin Chen, Prof.

Ning Dai

State Key Laboratory of Infrared Physics, Shanghai Institute of Technical  
Physics, Chinese Academy of Sciences, Shanghai 200083, China

Lepeng Zhang, Prof. Zhimin Chen

College of Materials Science and Engineering, Zhengzhou University,  
Zhengzhou 450052, China

Yunkai Shao, Prof. Xin Chen, Prof. Ning Dai

Hangzhou Institute for Advanced Study, University of Chinese Academy of  
Sciences

Hangzhou 310024, China

Tiantian Huang, Mengxia Qiu, Prof. Xin Chen, Prof. Ning Dai

University of Chinese Academy of Sciences, Beijing, 100049, China

\*Corresponding author. Email: xinchen@mail.sitp.ac.cn

<sup>§</sup> T. Huang and M. Qiu contributed equally to this work.

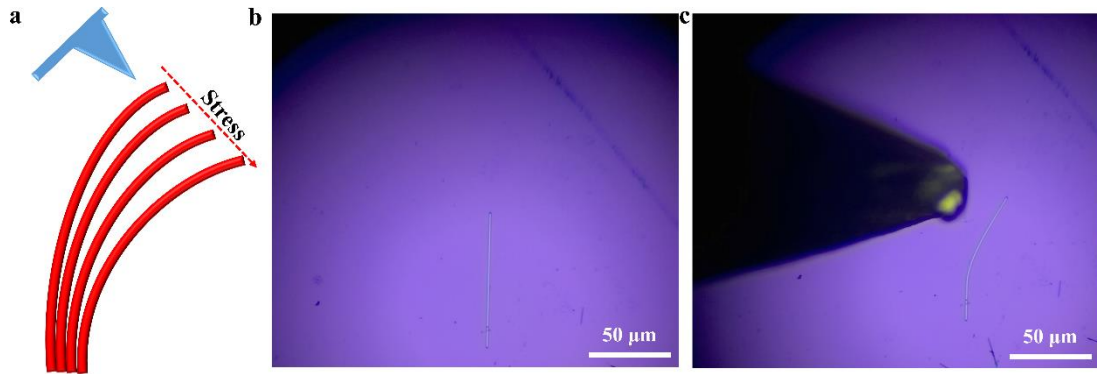

**Figure S1** a) Schematic diagram of bent VO<sub>2</sub> MW. Optical micrographs of the as-grown VO<sub>2</sub> MW b) before and c) after bending.

The VO<sub>2</sub> MWs were deposited on SiO<sub>2</sub>/Si substrate and the length was in about 100 μm while the width was around 1~2 μm. The weak binding between substrate and microwires was favorable for us to carry out bending experiments in situ.

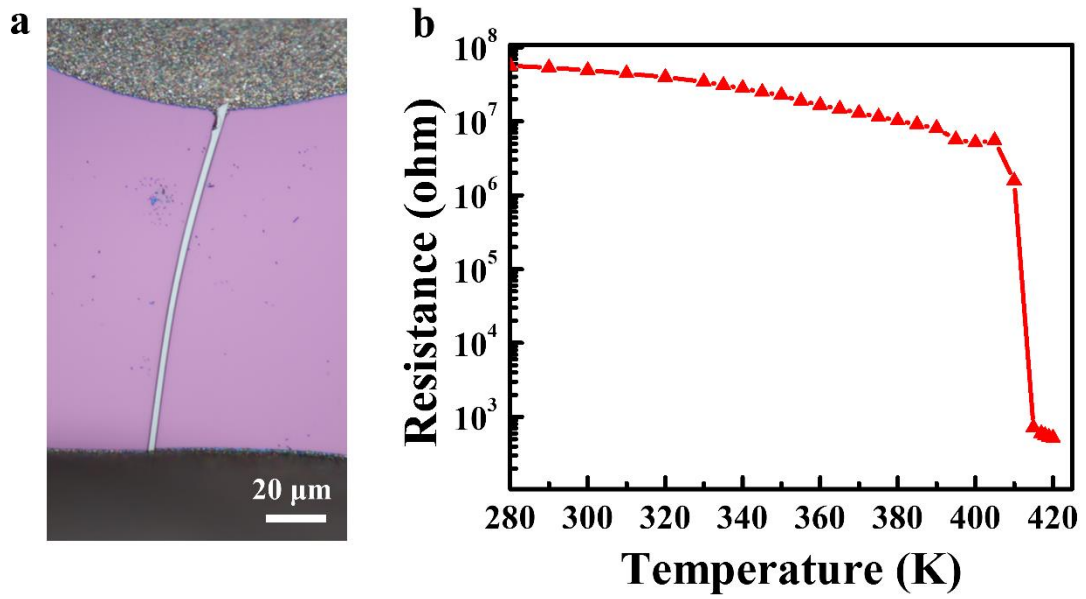

**Figure S2.** a) Optical micrographs of the bent VO<sub>2</sub> MW. b) Temperature dependence of the resistance of the bent VO<sub>2</sub>.

Figure S2 shown the MIT characteristics of the bent VO<sub>2</sub> MW. The magnitude of resistance change was about 10<sup>5</sup> with a transition temperature of 410 K.

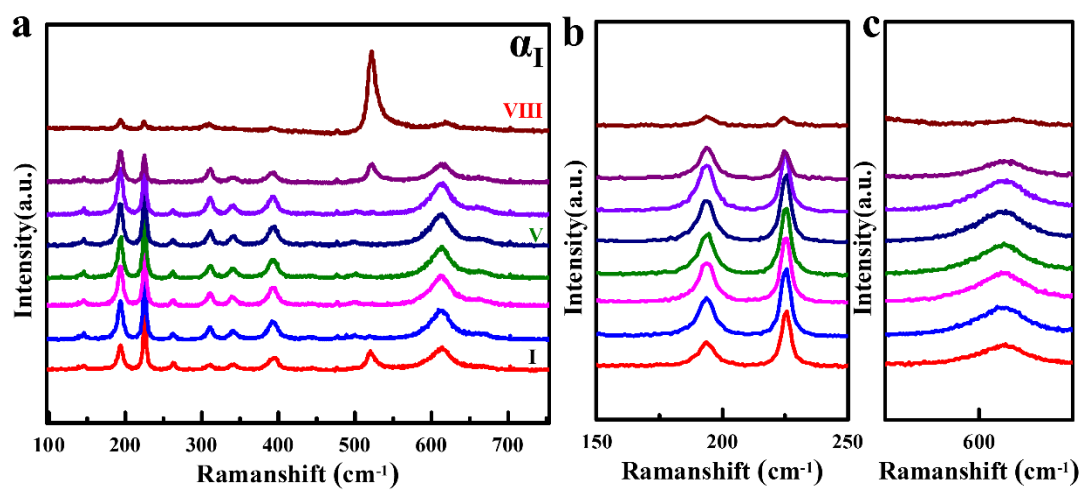

**Figure S3** a) Raman spectra of the domain  $\alpha$ . The enlarged Raman spectra of selected wavenumbers of b) 150  $\text{cm}^{-1}$  to 250  $\text{cm}^{-1}$  and c) 550  $\text{cm}^{-1}$  to 650  $\text{cm}^{-1}$ .

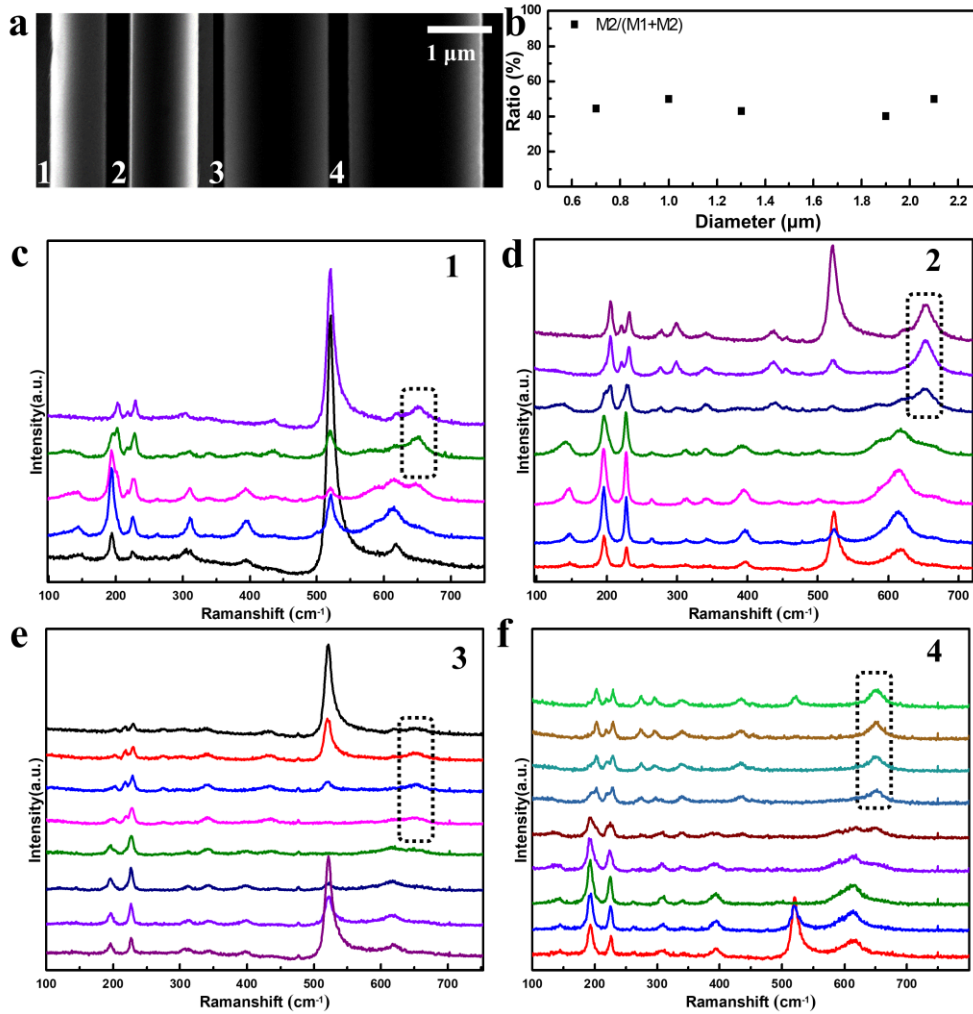

**Figure S4** a) SEM images of the bent VO<sub>2</sub> MWs with different radii marked as 1 (0.7  $\mu\text{m}$ ), 2 (1  $\mu\text{m}$ ), 3 (1.3  $\mu\text{m}$ ), 4 (1.9  $\mu\text{m}$ ). b) Relationship between the ratio of M2/(M1+M2) and the diameter of microwires. c-d) Raman spectra of the bent VO<sub>2</sub> MWs with radius of 1) 0.7  $\mu\text{m}$ , 2) 1  $\mu\text{m}$ , 3) 1.3  $\mu\text{m}$ , 4) 1.9  $\mu\text{m}$ . The black frame represents the Raman vibration mode of VO<sub>2</sub> of M2 phase.

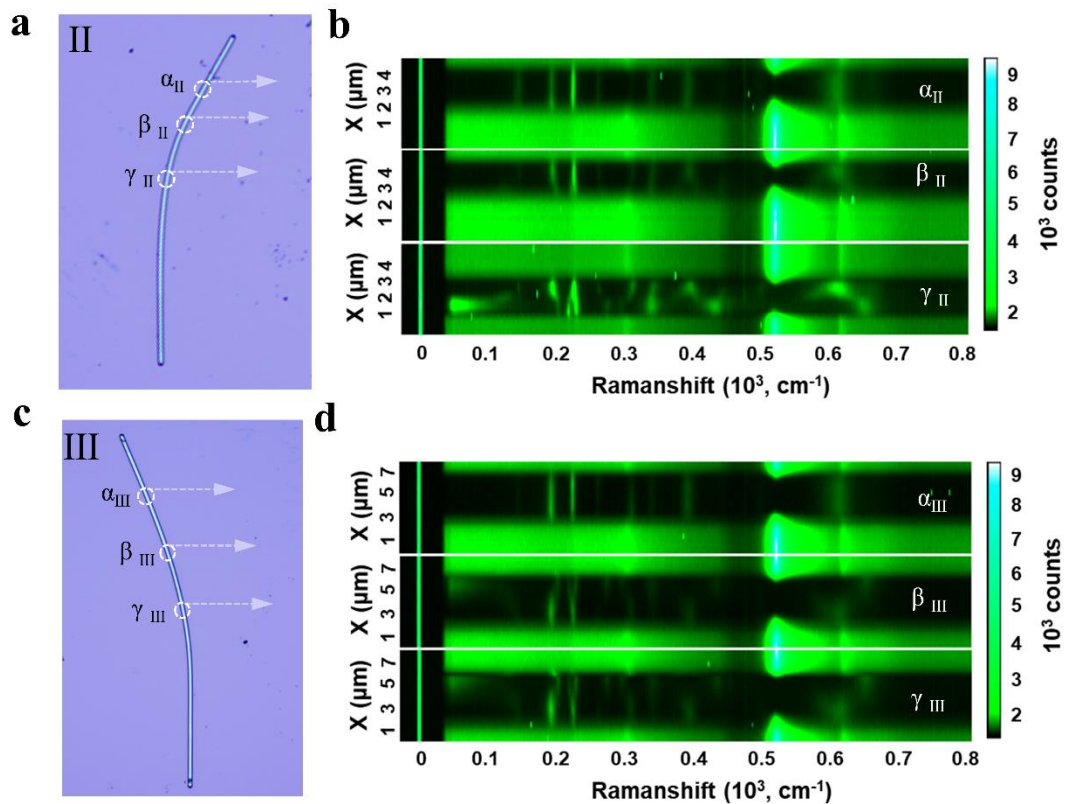

**Figure S5** a, c) Optical micrograph of the VO<sub>2</sub> MW marked as II, III respectively. Three domains marked as  $\alpha_{II}$ ,  $\beta_{II}$ ,  $\gamma_{II}$  were selected according to the bending degree. The white arrow presented line scan direction. b, d) Line-scanned mapping of the Raman spectra of the bent VO<sub>2</sub>-MW, corresponding to the three points in a, c) respectively.

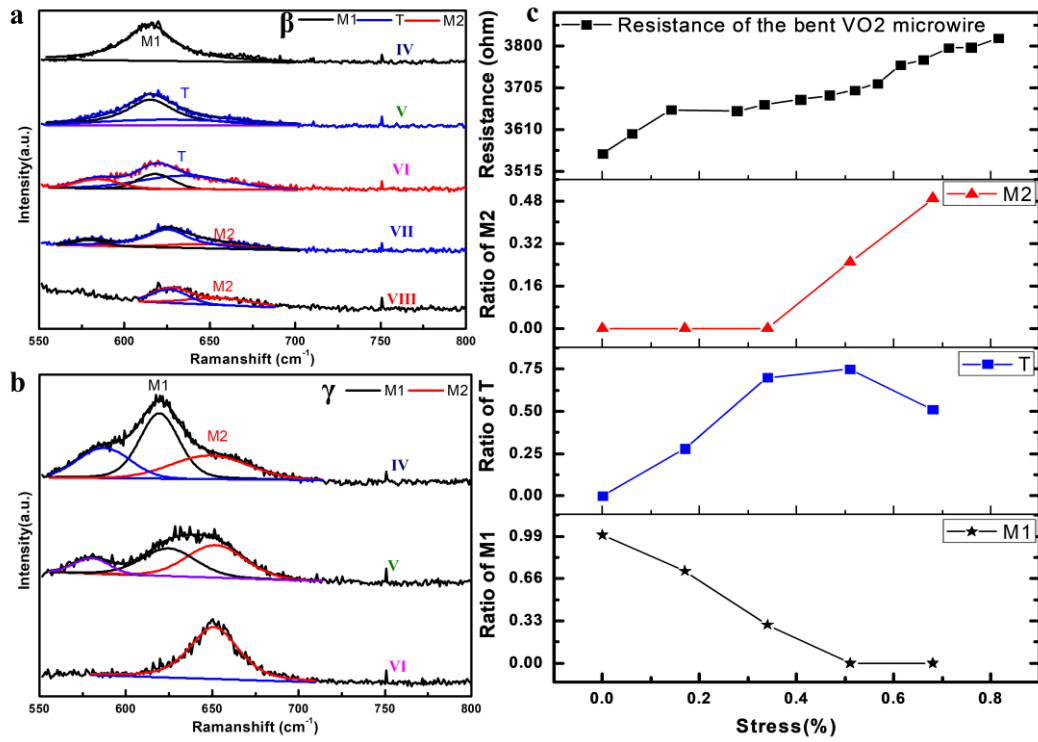

**Figure S6** Raman spectra and fitting curve of mode  $\omega_3$  in a) domain  $\beta$  and b) domain  $\gamma$ . c) Relationship of the stress, resistance and phases.
